# Supplementary material
Source: PubMed Central journal article supplement (PMC2762867)
Supplement: NIHMS150555-supplement-supplemental.pdf [file NIHMS150555-supplement-supplemental.pdf]

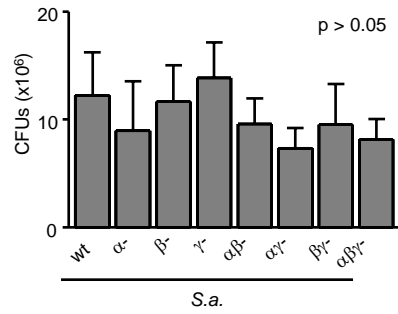

**Supplemental Figure 1.** WT mice (n = 5) were injected subcutaneously in the lower back with  $10^6$  CFUs of wt *S. aureus* (S.a.) or its isogenic hemolysin mutants. Circular tissue biopsies were collected 24 h after injection, homogenized and CFUs were measured by plating serial dilutions. Values represent mean  $\pm$  SEM. Results are representative of two separate experiments and were analyzed with a one-way ANOVA test.
